# Supplementary material for: Digital Health: Tracking Physiomes and Activity Using Wearable Biosensors Reveals Useful Health-Related Information
Source: PubMed Central journal article supplement (PMC5230763; doi:10.1371/journal.pbio.2001402), 2017-01-12
Supplement: pbio.2001402.s001.pdf [file pbio.2001402.s001.pdf]

**A**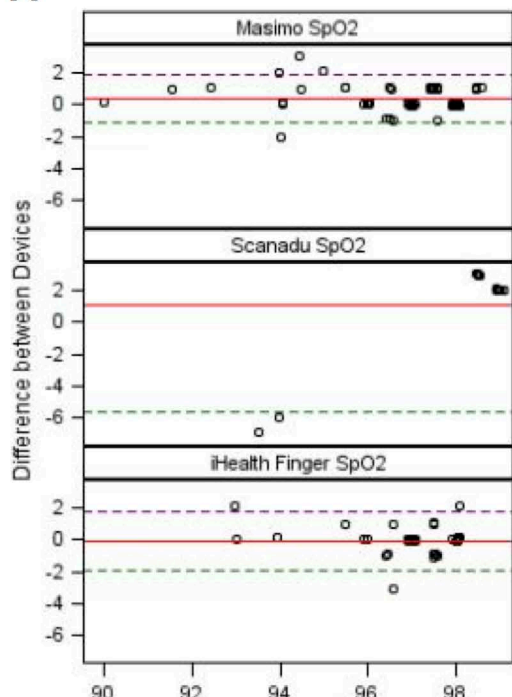**C**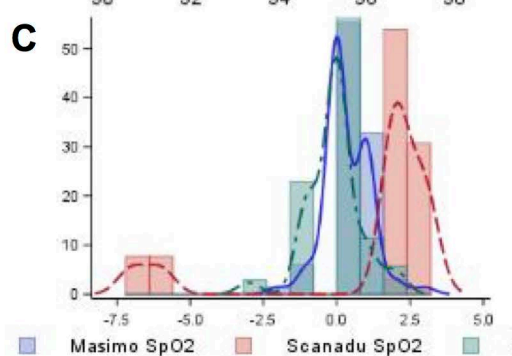**D**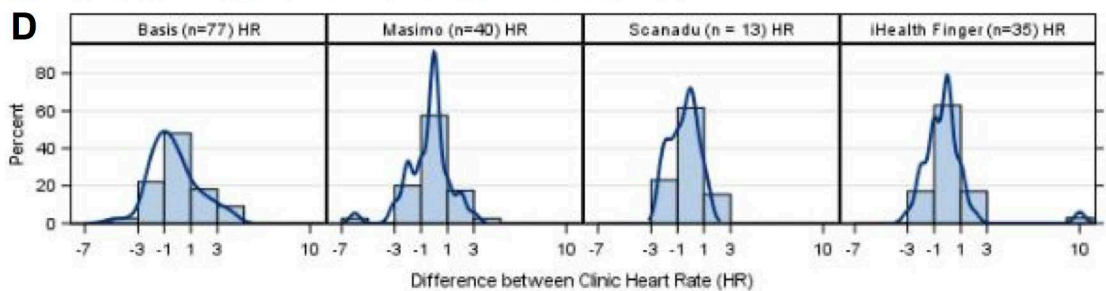**B**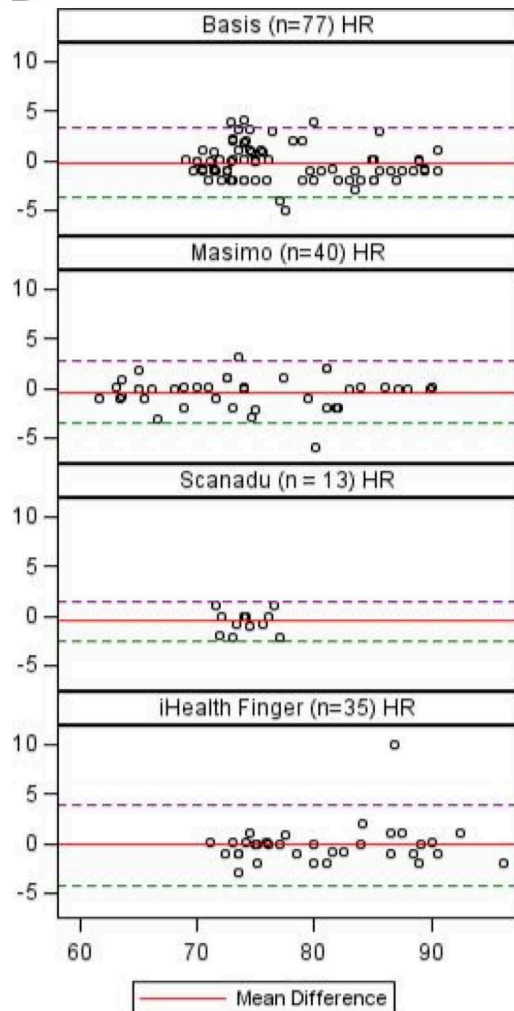**E**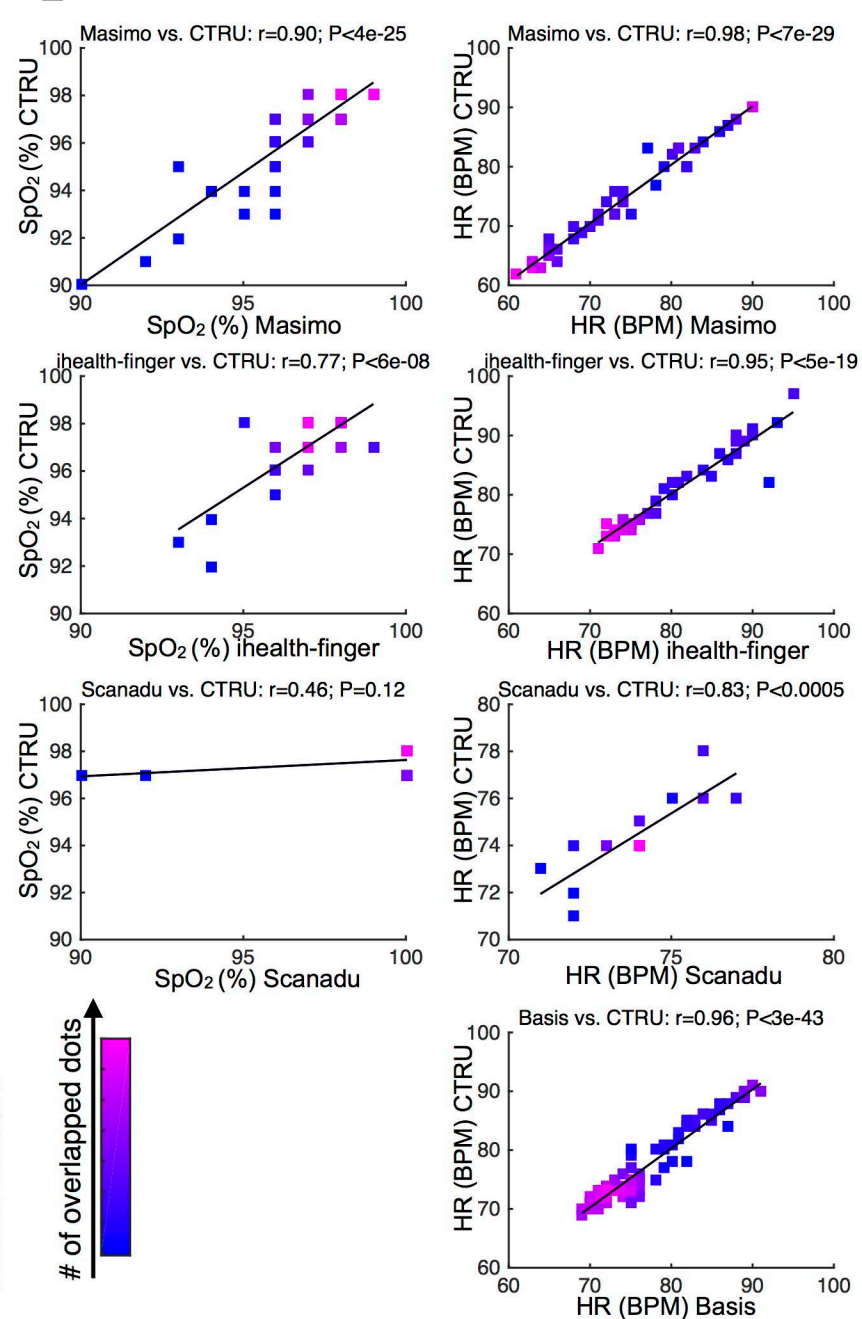

**F**

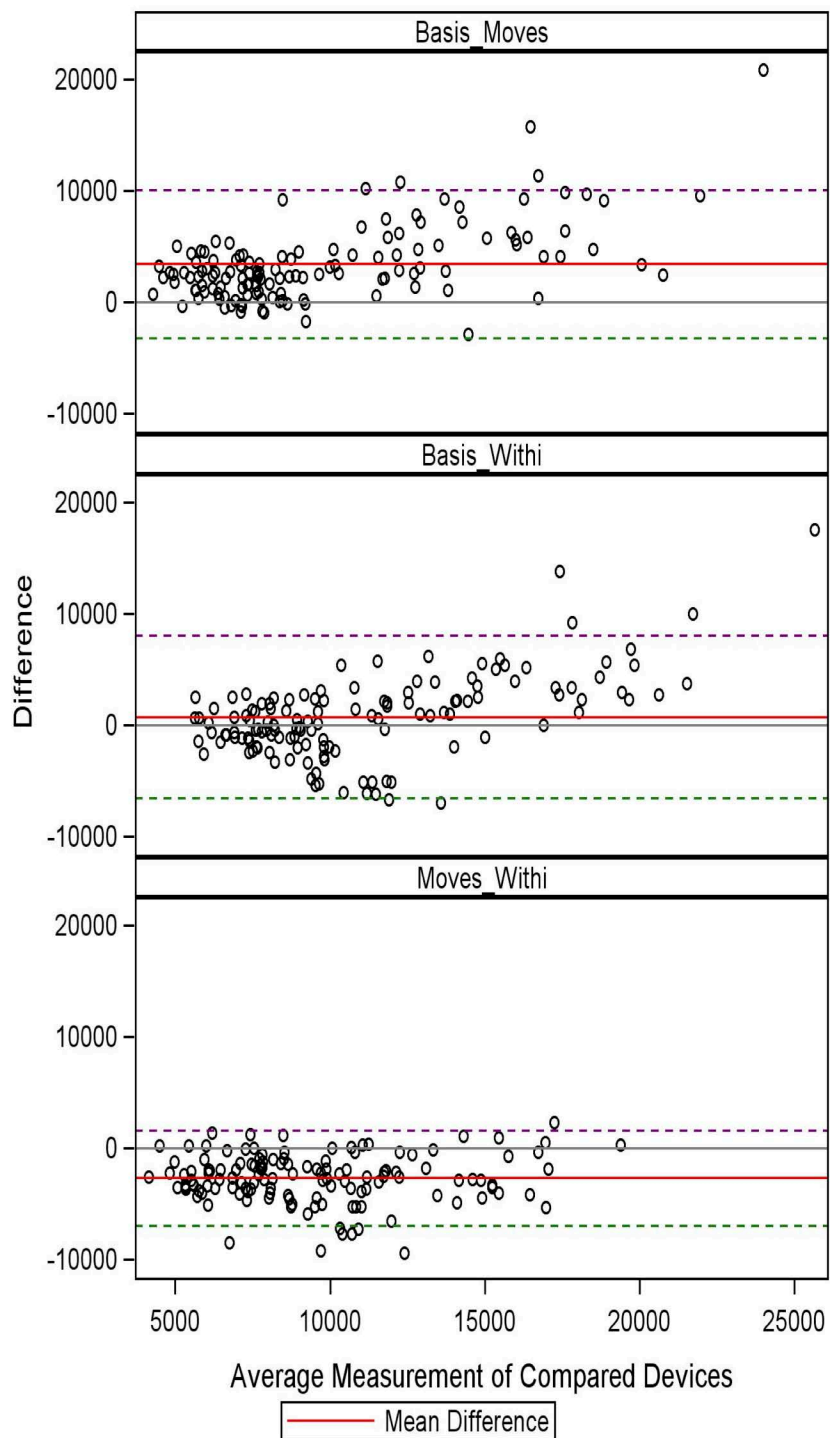

**G**

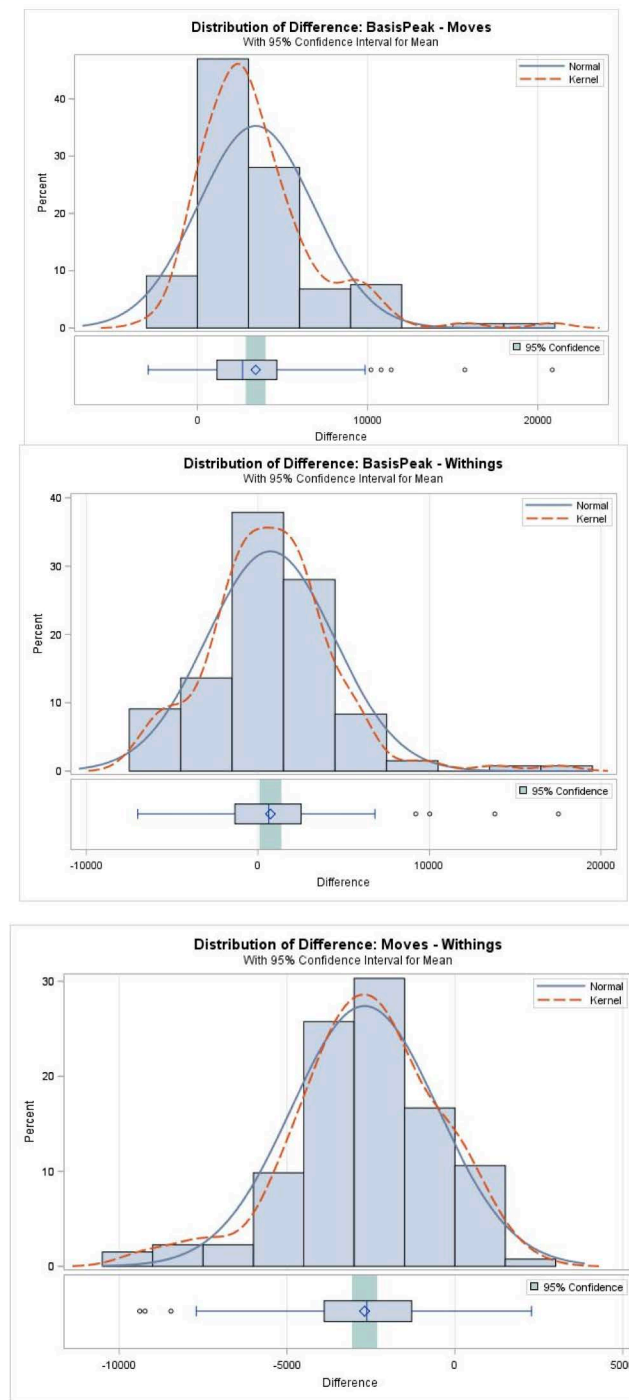

**H**

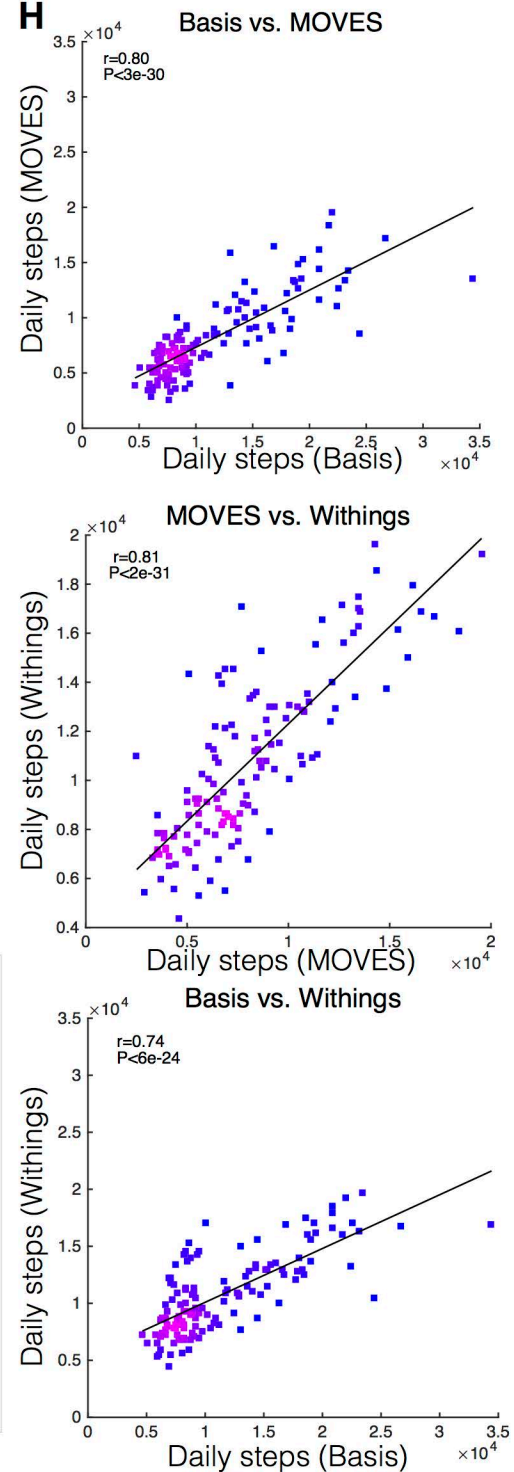

**S1 Fig**
