# Supplementary material for: Digital Health: Tracking Physiomes and Activity Using Wearable Biosensors Reveals Useful Health-Related Information
Source: PLoS Biol. 2017 Jan 12;15(1):e2001402. doi: 10.1371/journal.pbio.2001402 (PMC5230763; doi:10.1371/journal.pbio.2001402)
Supplement: S1 Table — (A) 43 individuals participate in the analysis of personal baseline and health (B) flight study (C) Survey results to determine the location of the probe (inside or outside of the wrist, higher or lower on the arm, in the second column of the table) and whether the probe was always flush with the skin (based on tightness level of watch, on a scale of 1–4, where the descriptors for each numerical value were: 1. Very loose (watch turns around sometimes); 2. Somewhat loose (1–2 fingers fit under band, but no watch turning); 3. Tight (can just barely fit 1 fingertip under band); 4. Very tight (cannot fit any fingertips under band, watch cannot be tightened any further). (XLSX) [file pbio.2001402.s009.xlsx]

## Sheet: Sheet1
A.
	Age	BMI	HR	Skin Temp	Steps per Day	SSPG	# days monitored by Basis
Number of records	38	36	43	43	43	20	43
Average	55.76	29.36	72.1	89.19	5226.99	165.23	152.3
Standard Deviation	10.02	4.83	6.75	1.88	2435.66	80.51	117.53
	European	African American	Asian	Hispanic
# of Females	13	3	2	2
(age range)
# of Males	13	1	3	0
(age range)
5 were not reported
B.
	European	African American and European	Jewish	East Asian	Indian Asian
# of Females	3 (28-52)	1 (29)	2 (28-72)	2 (32-53)	N/A
(age range)
# of Males	5 (29-72)	N/A	1 (29)	3 (31-53)	1 (29)
(age range)
C.
ID	Watch face on inside or outside of wrist?	Tightness of band
1	in	2
2	in	2
5	out	3
7	out	3
15	out	3
16	out	3
17	out	2
21	out	3
22	in	2
23	out	3
25	out	3
33	out	3
36	out	3
37	out, higher on forearm	2
